# Supplementary material
Source: Springer Nature journal article supplement (https://www.springermedizin.de/resource/supplementary/12894_2012_223_MOESM3_ESM.pdf/9513238)

**3%(n=1)**

**8%**  
**(n=3)**

**89%**  
**(n=34)**

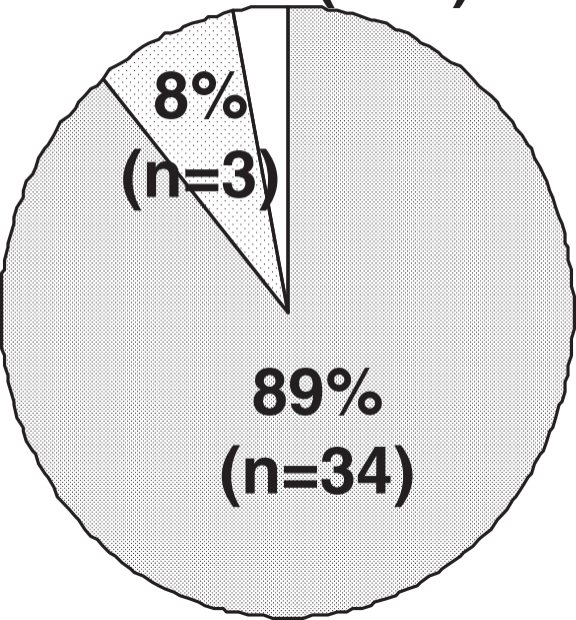

Supplement: MOESM3 [file 9513238]
